# Supplementary material for: An Intelligent In-Shoe System for Gait Monitoring and Analysis with Optimized Sampling and Real-Time Visualization Capabilities
Source: Sensors (Basel). 2021 Apr 19;21(8):2869. doi: 10.3390/s21082869 (PMC8074136; doi:10.3390/s21082869)
Supplement: Supplementary file 1 [file sensors-21-02869-s001.zip]

Archive with 10 entries (10 files):
- Supplementary Report.pdf
- __MACOSX/._Supplementary Report.pdf
- supplementary_video_1.mp4
- __MACOSX/._supplementary_video_1.mp4
- supplementary_video_2.mp4
- __MACOSX/._supplementary_video_2.mp4
- supplementary_video_3.mp4
- __MACOSX/._supplementary_video_3.mp4
- supplementary_video_4.mp4
- __MACOSX/._supplementary_video_4.mp4
